# Supplementary material
Source: bioRxiv or medRxiv preprint supplement (https://www.biorxiv.org/highwire/filestream/24568/field_highwire_adjunct_files/0/087908-1.pdf)
Supplement: Supplementary file [file 087908-1.pdf]

## CARDs from PFAM

| Name       | Uniprot     | NCBI   | PFAM Residue<br>Boundaries | Extended Boundaries<br>(PFAM +/- 10 residues) | Structure Used<br>for Comparison |
|------------|-------------|--------|----------------------------|-----------------------------------------------|----------------------------------|
| APAF1      | APAF_HUMAN  | O14727 | NP_863651.1                | 6 90                                          | 1 100 1CY5                       |
| ASC        | ASC_HUMAN   | Q9ULZ3 | NP_037390.2                | 112 195                                       | 102 195 2KN6                     |
| Bcl10      | BCL10_HUMAN | O95999 | NP_003912.1                | 17 100                                        | 7 110 2MB9                       |
| CARD6      | CARD6_HUMAN | Q9BX69 | NP_115976.2                | 9 92                                          | 1 102 N/A                        |
| CARD8      | CARD8_HUMAN | Q9Y2G2 | NP_001171829.1             | 452 535                                       | 442 537 4IKM                     |
| CARD9      | CARD9_HUMAN | Q9H257 | NP_434700.2                | 11 97                                         | 1 107 N/A                        |
| CARD10     | CAR10_HUMAN | Q9BWT7 | NP_055365.2                | 28 114                                        | 18 124 N/A                       |
| CARD11     | CAR11_HUMAN | Q9BXL7 | NP_115791.3                | 23 109                                        | 13 119 4LWD                      |
| CARD14     | CAR14_HUMAN | Q9BXL6 | NP_077015.2                | 20 106                                        | 10 116 N/A                       |
| CARD16     | CAR16_HUMAN | Q5EG05 | NP_001017534 .1            | 3 90                                          | 1 100 N/A                        |
| CARD17     | CAR17_HUMAN | Q5XLA6 | NP_001007233.1             | 3 90                                          | 1 100 N/A                        |
| CARD18     | CAR18_HUMAN | P57730 | NP_067546.1                | 6 87                                          | 1 90 1DGN                        |
| CASP1      | CASP1_HUMAN | P29466 | NP_150634.1                | 3 90                                          | 1 100 N/A                        |
| CASP2      | CASP2_HUMAN | P42575 | NP_116764.2                | 37 118                                        | 27 128 N/A                       |
| CASP4      | CASP4_HUMAN | P49662 | NP_001216.1                | 5 89                                          | 1 99 N/A                         |
| CASP5      | CASP5_HUMAN | P51878 | NP_004338.3                | 61 147                                        | 51 157 N/A                       |
| CASP9      | CASP9_HUMAN | P55211 | NP_001220.2                | 17 90                                         | 7 100 4RHW                       |
| CASP12     | CASPC_HUMAN | Q6UXS9 | NP_001177945.2             | 12 91                                         | 2 101 N/A                        |
| cIAP1      | BIRC2_HUMAN | Q13490 | NP_001157.1                | 458 542                                       | 448 552 3T6P                     |
| cIAP2      | BIRC3_HUMAN | Q13489 | NP_001156.1                | 441 530                                       | 431 540 N/A                      |
| MDA5_CARD2 | IFIH1_HUMAN | Q9BYX4 | NP_071451.2                | 115 200                                       | 105 210 N/A                      |
| NLRC4      | NLRC4_HUMAN | Q9NPP4 | NP_067032.3                | 2 87                                          | 1 97 N/A                         |
| NLRP1      | NALP1_HUMAN | Q9C000 | NP_127497.1                | 1379 1460                                     | 1369 1470 4IFP                   |
| NOD1       | NOD1_HUMAN  | Q9Y239 | NP_006083.1                | 21 92                                         | 11 102 2DBD                      |
| NOD2_CARD1 | NOD2_HUMAN  | Q9HC29 | NP_071445.1                | 31 121                                        | 21 131 N/A                       |
| NOD2_CARD2 | NOD2_HUMAN  | Q9HC29 | NP_071445.1                | 132 215                                       | 122 225 N/A                      |
| NOL3       | NOL3_HUMAN  | O60936 | NP_003937.1                | 10 95                                         | 1 105 4UZO                       |
| RAIDD      | CRADD_HUMAN | P78560 | NP_003796.1                | 6 78                                          | 1 88 3CRD                        |
| RIP2       | RIPK2_HUMAN | O43353 | NP_003812.1                | 437 524                                       | 427 534 2N7Z                     |

**CARDS Added by BLASTp, PSIBLAST and JACKHMMer**

|            |             |        |                |     |     |    |     |      |
|------------|-------------|--------|----------------|-----|-----|----|-----|------|
| BINCA      | CAR19_HUMAN | Q96LW7 | NP_115686.3    | 10  | 95  | 1  | 105 | 4DWN |
| CIITA      |             |        | XP_006720943.2 | 26  | 87  | 16 | 97  | N/A  |
| DLG5       | DLG5_HUMAN  | Q8TDM6 | NP_004738.3    | 7   | 88  | 1  | 98  | N/A  |
| MAVS       | MAVS_HUMAN  | Q7Z434 | NP_065797.2    | 3   | 93  | 1  | 103 | 2VGQ |
| MDA5 CARD1 | IFIH1_HUMAN | Q9BYX4 | NP_071451.2    | 8   | 99  | 1  | 109 | N/A  |
| RIG-I 1    | DDX58_HUMAN | O95786 | NP_055129.2    | 2   | 92  | 1  | 102 | 4P4H |
| RIG-I 2    | DDX58_HUMAN | O95786 | NP_055129.2    | 100 | 189 | 90 | 199 | 4P4H |

**Atypical CARDS**

|                                                          |             |        |             |     |     |     |     |      |
|----------------------------------------------------------|-------------|--------|-------------|-----|-----|-----|-----|------|
| NLRC3                                                    | NLRC3_HUMAN | Q7RTR2 | NP_849172.2 | 1   | 60  | 1   | 60  | N/A  |
| NLRC5                                                    | NLRC5_HUMAN | Q86WI3 | NP_115582.4 | 1   | 96  | 1   | 96  | 2MJM |
| Glutamine-rich<br>protein                                | QRIC1_HUMAN | Q2TAL8 | NP_060200.2 | 6   | 74  | 1   | 84  | N/A  |
| Tumour<br>Necrosis<br>Factor<br>Superfamily<br>Member 21 | TNR21_HUMAN | O75509 | NP_055267.1 | 564 | 655 | 564 | 655 | 2DBH |

**Novel CARDS**

|                             |            |        |             |     |     |     |     |     |
|-----------------------------|------------|--------|-------------|-----|-----|-----|-----|-----|
| E3 Ubiquitin<br>Ligase TTC3 | TTC3_HUMAN | P53804 | NP_003307.3 | 816 | 903 | 806 | 913 | N/A |
|-----------------------------|------------|--------|-------------|-----|-----|-----|-----|-----|

**Supplementary Table 1**

**Structural Alignment:**

```

          1      2      3      45  6      7      8      910      11 12      13 14
APAF-1 (1CY5)  ----MDAKARNCLLQHREALLEK--DLEK---TSYIMDHMLIS--DGFLITISEEEKVRNEPTQQ---QRAAMLTKMILKKN--DSYVSYFYNALLHEG--YKDLAALLHDGIP---
ASC (2KN6)    -----GLHFDQHRAALIA--RVTN--VEWLLDALYG---KVLTDQEQYQAVRAEPTNP---SKMRKLFSTPAWNW--TKCDLLQALRES---QSYLVEDLERS-----
Bcl-10 (2MB9) -----KKDALLENLRVYLCE--KII---AERHFDHLRA--KKILSREDTREISCRSSR---KRAKLLDYLQENP--KGLDTLVESIRREK-TQNFLIQKITDEVLKLKLR
CARD11 (4LWD) -----ALWENVECNRHMLSR--YIN---PAKLTPLYLRQ--CKVIDEQDEEVLNAPMLPSKINRAGRLLDILHTKGQ--RGYVVFLESLEFY---YPELYKLVGTGKE----
NLRP1 (4IFP)  -----LHFVDQYREQLIA--RVTS--VEVVLDKLHG---QVLSQEQYERVLAENTRP---SQMRKLFSLSQSWDR--KCKDGLYQALKET---HPHLMELWEK-----
BINCA (4DWN)  -----DQTYCDRLVQDTPFLTGHGRLESEQQVDRIILQLNRYYPQILTNKEAEKFRNPKASLR--VRLCDLLSHLQSRGE--RDCQEFYRALYIH---AQPLHSRLPSRH----
CARD8 (4IKM)  -----DAAFVKENHRQLQA--RMGD--LKGVLDDLDQD--NEVLTENEKELVEQEKTRQ---SKNEALLSMVEKKGD--LALDVLFRSISER---DPYLVSYLRQQNL----
CARD18 (1DGN) -----ADQLLRKKRRIFIH--SVGAGTINALLDLLE--DEVISQEDMNKVRDENDTVM--DKARVLIDLVTGKGP--KSCCKFIKHLCEE---DPQLASKMGLH-----
CIAP1 (3T6P)  -----SDDLSELRKNRMALFQ--QLTC--VLPILLDNLLK--ANVINKQEHDIKQKTQIP---LQARELIDTILVKGN--AAANIFKNCLKEI---DSTLYKNLF-----
RAIDD (3CRD)  ----MEARDKQVLRSLRLELGAE--VLV---EGLVLQYLYQ--EGILTENHIQEIQAQTGL---RKTMLLLDILPSRGP--KAFDTFLDSLQEF---PWVREKLLKKAREEAM
RIG-I_CARD1 (4P4H) ---MTTEQRRSLQAFQDYIRK--TLD---PTYILSYMA----PWFREEEVQYIQAENKNGPMEATFLFKFLELQEEGWFRGFLDALDHAG--YSGLYEATIESWDF---
RIG-I_CARD2 (4P4H) KKIEKLEEYRLLKRLQPEFKT--RII---PTDIIISDLS---ECLINQECEELQICSTKGMGAEKLEVECLLRSKDNWPKTLKLALEKE---RNKFSSELWIV-----
MAVS (2VGQ)   ---FAEDKTYKYICRNFSNFC--NVD---VVEILPYL-----PCLTARDQDRIRATCTLSGNRDTLWHLFNTLQRRP--GWVEYFIAALRGCE--LVDLADEVASVYQ---
Caspase-9 (4RHW) ---MDEADRRLLRRCRLRLVE--ELQ---VDQLWDALLS--RELFPHMIEDIQRAGSGS--RRDQARQLIIDLETRGS--QALPLFISCLEDTG--QDMLASFLRTRNRQA--
NOD1 (2DBD)   -----HPHIQLKSNRELLVT--HIRN--TQCLVDNLLK--NDYFSAEDAETVCACPTQP---DKVRKILLDLVQSKGE--EVSEFFLYLLQQLADAYVDLRPWLEIGF---
RIPK2 (2N7Z)  -----GIAQQWIQSKREDIVN--QMTACLNQSLDALLS--RDLIMKEDYELVSTKPTRT---SKVRQLDITTDIQGE--EFAKVIVQKLDKN-----KQMGLPYPEIIL---
NOL3 (4UZ0)   -----QERPSETIDREKRLVE--TLQAD--SGLLLDALLA--RGVLTGPEYEALDALPDAE---RRVRRLLLLLVQKGE--AACQELLRCAQRTAGA-----
          1111111111  bb      222222      tt333333333      44444444      555555555      66666

```

**Supplementary Figure 1:** Final alignment of the 17 CARD structures available from the PDB. PDB identifiers for each structure are provided in brackets. Hydrophobic residues are highlighted yellow and numbered above the alignment. Helix position as per the Apaf-1 structure, PDB 1CY5, are marked by numbers below the alignment.
